# Supplementary material for: Cell Force-Driven Basement Membrane Disruption Fuels EGF- and Stiffness-Induced Invasive Cell Dissemination from Benign Breast Gland Acini
Source: Int J Mol Sci. 2021 Apr 12;22(8):3962. doi: 10.3390/ijms22083962 (PMC8070162; doi:10.3390/ijms22083962)
Supplement: Supplementary file 1 [file ijms-22-03962-s001.zip]

Archive with 6 entries (6 files):
- ijms-1161653 supplementary.v3_proof.pdf
- Movie S1_TFM 65hours_ld-BM acini on 12 kPa.avi
- Movie S2_TFM 65 hours_hd-BM acinus 120 Pa.avi
- Movie S3_ERISM time lapse_ld-BM acini.mp4
- Movie S4_ERISM time lapse_hd-BM acini.mp4
- Movie S5_ERISM time lapse_ld-BM acini plus FEM.avi
